# Supplementary material for: Ordered mesoporous carbon with enhanced porosity to support organic amines: efficient nanocomposites for the selective capture of CO2
Source: Royal Society of Chemistry journal article supplement (doi:10.1039/c9nj00617f), 2019-01-01
Supplement: c9nj00617f1.pdf [file c9nj00617f1.pdf]

## Supporting Information

### **Ordered Mesoporous Carbon with Enhanced Porosity to Support Organic Amine: Efficient Nanocomposites for the Selective Capture of CO<sub>2</sub>**

*Weiping Kong\* and Jing Liu*

*School of Teacher Education, Shaoxing University, Shaoxing, Zhejiang, 312000,*

*China. E-mail: kongweiping0111@163.com*

## Gas adsorption

Before measurement, the samples were pretreated at 180 °C in a N<sub>2</sub> flow for 12 h. The CO<sub>2</sub> and N<sub>2</sub> adsorption isotherms at 0, 30, 50 and 75 °C were measured using the Micromeritics Tristar II 3020 system. Correspondingly, adsorption selectivity in cases of CO<sub>2</sub>/N<sub>2</sub> were calculated according to the Ideal Adsorption Solution Theory (IAST).

**Table S1** The element (C, N and O) content of prepared samples.

| Samples       | Contents<br>(wt.%) <sup>a</sup> | C (wt %) <sup>b</sup> | N (wt %) | O (wt %) |
|---------------|---------------------------------|-----------------------|----------|----------|
| OMC           | ---                             | 93.36                 | ---      | 6.64     |
| 0.29PEI@OMC   | 28.2                            | 80.35                 | 11.29    | 4.23     |
| AOMC          | ---                             | 92.13                 | 2.85     | 5.02     |
| 0.26PEI@AOMC  | 25.7                            | 80.06                 | 12.21    | 4.08     |
| 0.44PEI@ AOMC | 44.4                            | 72.05                 | 18.56    | 3.01     |
| 0.52PEI@ AOMC | 51.6                            | 67.89                 | 21.58    | 2.47     |
| 0.60PEI@ AOMC | 60.2                            | 64.53                 | 24.67    | 2.03     |

<sup>a</sup> The loading contents of PEI estimated by the thermogravimetric analysis. <sup>b</sup> Determined from elemental analysis.

**Table S2** A comparison of CO<sub>2</sub> adsorption capacities of reported porous materials.

| Samples             | Temperature (°C) | Pressure (bar) | CO <sub>2</sub> capacities (mmol/g) | Refs.     |
|---------------------|------------------|----------------|-------------------------------------|-----------|
| AOMC                | 30               | 0.15           | 0.52                                | This work |
| 0.44PEI@AOMC        | 30               | 0.15           | 0.72                                | This work |
| 0.52PEI@AOMC        | 30               | 0.15           | 0.69                                | This work |
| COP-19              | 25               | 0.15           | 0.40                                | S1        |
| Azo-COP-2           | 25               | 0.15           | 0.41                                | S2        |
| PPN-101             | 25               | 0.15           | 0.39                                | S3        |
| MAPOP-4             | 25               | 0.15           | 0.45                                | S4        |
| PCP-BF <sub>4</sub> | 25               | 0.15           | 0.34                                | S5        |
| DA-CMP-1            | 25               | 0.15           | 0.30                                | S6        |
| TNCMP-2             | 25               | 0.15           | 0.30                                | S7        |
| TBMID               | 25               | 0.15           | 0.50                                | S8        |

**Table S3** A comparison of CO<sub>2</sub>/N<sub>2</sub> selectivities of porous materials reported in the literature.

| Porous materials | Temperature (°C) | Method            | CO <sub>2</sub> /N <sub>2</sub> selectivities | Refs.     |
|------------------|------------------|-------------------|-----------------------------------------------|-----------|
| AOMC             | 30               | IAST <sup>a</sup> | 43                                            | This work |
| 0.44PEI@AOMC     | 30               | IAST <sup>a</sup> | 58                                            | This work |
| 0.52PEI@AOMC     | 30               | IAST <sup>a</sup> | 64                                            | This work |
| PFPOP-3          | 25               | IAST              | 57                                            | S9        |
| DA-CMP-1         | 25               | IAST              | 60                                            | S6        |
| SNW-1            | 25               | IAST              | 50                                            | S10       |
| Mg-MOF-74        | 30               | IAST              | 44                                            | S11       |
| Cu-BTC           | 10               | IAST              | 34                                            | S12       |
| MIL-101          | 25               | IAST              | 12                                            | S13       |

<sup>a</sup> IAST CO<sub>2</sub>/N<sub>2</sub> (0.1:0.9 v/v) selectivity at 1 bar over prepared samples.

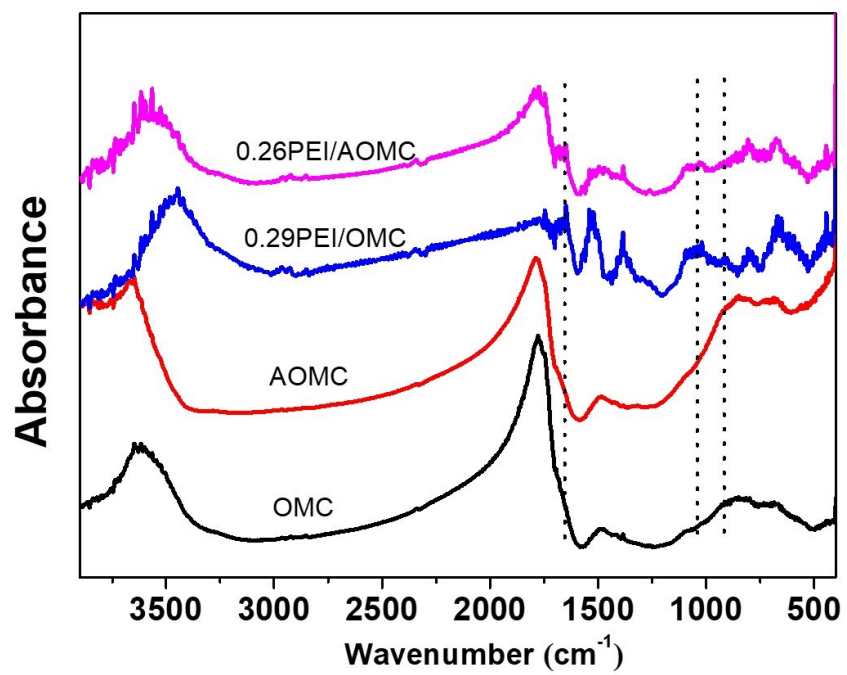

Figure S1 FTIR spectrum of prepared samples.

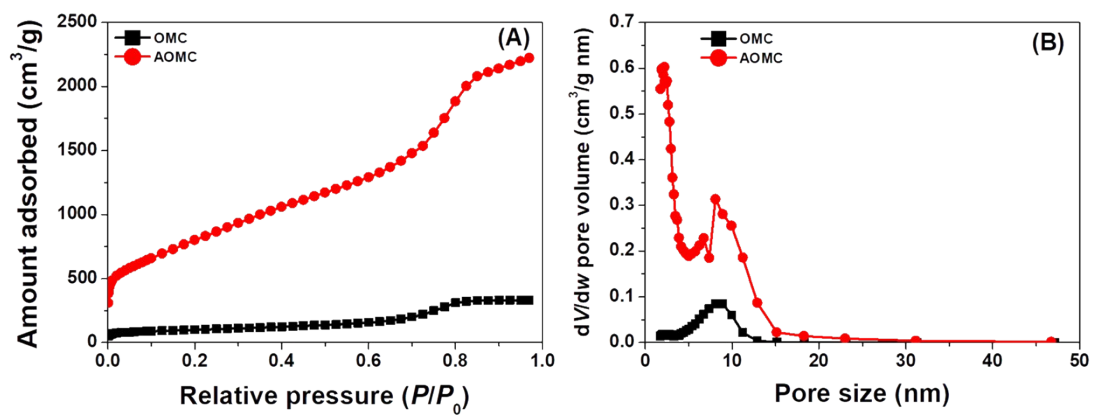

**Figure S2** N<sub>2</sub> adsorption isotherms at -196 °C (A) and BJH pore size distributions (B) of OMC and AOMC.

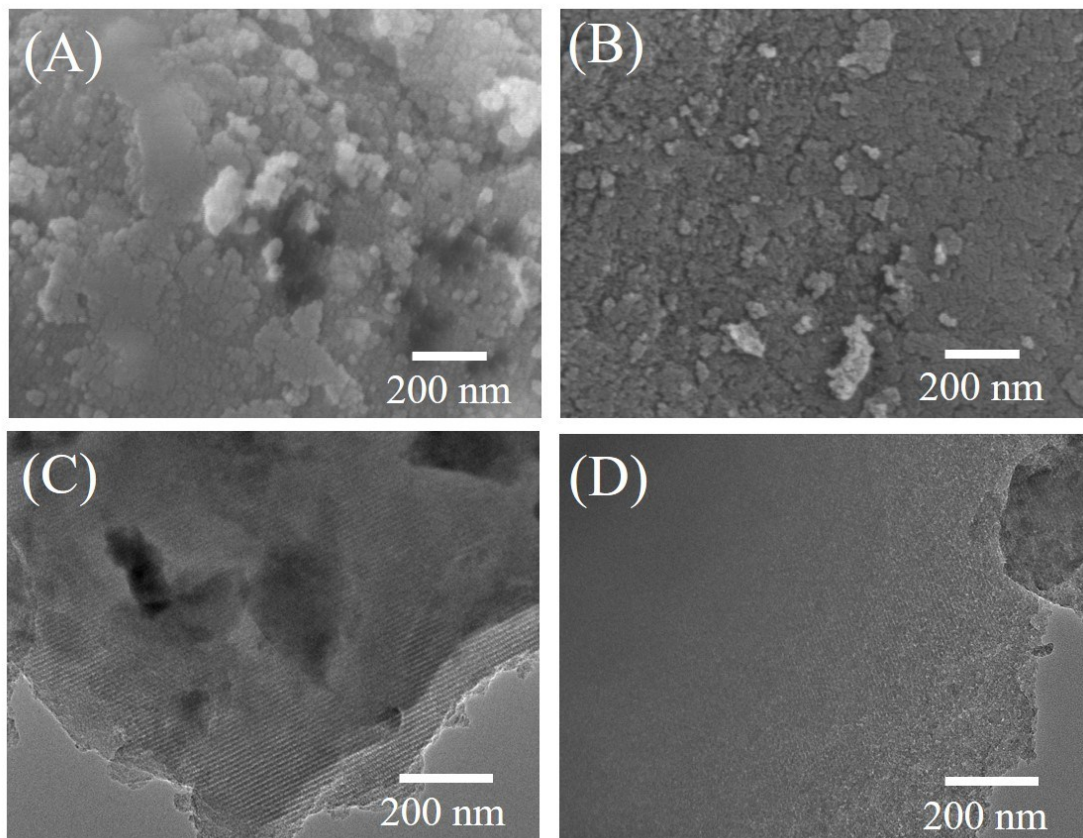

**Figure S3** High resolved SEM and TEM images of pristine (A,C) 0.29PEI@OMC and (B,D) 0.26PEI@AOMC samples.



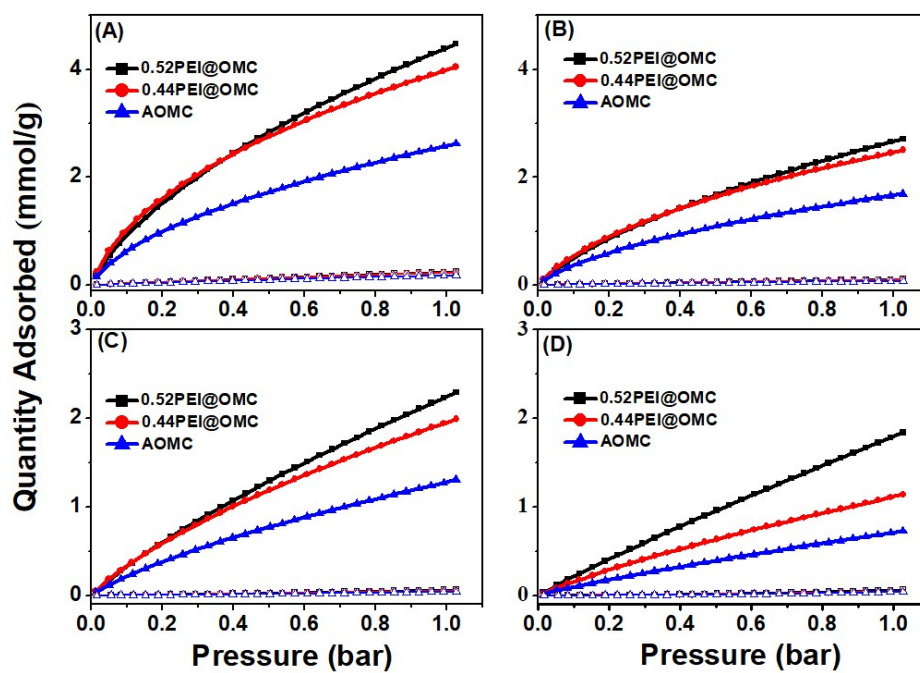

**Figure S4** CO<sub>2</sub> (solid symbols) and N<sub>2</sub> (hollow symbols) adsorption isotherms of prepared samples at (A) 0 °C, (B) 30 °C, (C) 50 °C and (D) 75 °C.

## References

- [S1] H. A. Patel, C. T. Yavuz, Highly optimized CO<sub>2</sub> capture by inexpensive nanoporous covalent organic polymers and their amine composites, *Faraday Discuss.* 183 (2015) 401–412.
- [S2] H. A. Patel, S. H. Je, J. Park, D. P. Chen, Y. Jung, C. T. Yavuz, A. Coskun, Unprecedented high-temperature CO<sub>2</sub> selectivity in N<sub>2</sub>-phobic nanoporous covalent organic polymers, *Nat Commun.* 4 (2013) 1357–1364.
- [S3] M. Zhang, Z. Perry, J. Park, H. C. Zhou, Stable benzimidazole-incorporated porous polymer network for carbon capture with high efficiency and low cost, *Polymer* 55 (2014) 335–339.
- [S4] X. Ding, H. Li, Y. C. Zhao, B. H. Han, Mannitol-based acetal-linked porous organic polymers for selective capture of carbon dioxide over methane, *Polymer Chem.* 6 (2015) 5305–5312.
- [S5] O. Buyukcakir, S. H. Je, D. S. Choi, S. N. Talapaneni, Y. Seo, Y. Jung, K. Polychronopoulou, A. Coskun, Porous cationic polymers: the impact of counteranions and charges on CO<sub>2</sub> capture and conversion, *Chem. Commun.* 52 (2016) 934–937.
- [S6] X. Y. Wang, Y. Zhao, L. Wei, C. Zhang, J. X. Jiang, Nitrogen-rich conjugated microporous polymers: impact of building blocks on porosity and gas adsorption, *J. Mater. Chem. A* 3 (2015) 21185–21193.
- [S7] S. Ren, R. Dawson, A. Laybourn, J. X. Jiang, Y. Khimyak, D. J. Adams, A. I. Cooper, Functional conjugated microporous polymers: from 1,3,5-benzene to 1,3,5-triazine, *Polymer Chem.* 3 (2012) 928–934.
- [S8] Y. Zhao, X. Wang, C. Zhang, F. Xie, R. Kong, J. X. Jiang, Isoindigo-based microporous organic polymers for carbon dioxide capture, *RSC Adv.* 5 (2015) 100322–100329.
- [S9] S. H. Jia, X. Ding, H. T. Yu, B. H. Han, Multi-hydroxyl-containing porous organic polymers based on phenol formaldehyde resin chemistry with high carbon dioxide capture capacity, *RSC Adv.* 5 (2015) 71095–71101.
- [S10] X. Gao, X. Zou, H. Ma, S. Meng, G. Zhu, Highly selective and permeable porous organic framework membrane for CO<sub>2</sub> capture, *Adv. Mater.* 26 (2014) 3644–3648.
- [S11] J. A. Manso, K. Sumida, Z. R. Herm, R. Krishna, J. R. Long, Evaluating metal–organic frameworks for post-combustion carbon dioxide capture via temperature swing adsorption, *Energ. Environ. Sci.* 4 (2011) 3030–3040.

- [S12] P. Aprea, D. Caputo, N. Gargiulo, F. Iucolano, F. Pepe, Modeling carbon dioxide adsorption on microporous substrates: comparison between Cu-BTC metal–organic framework and 13X zeolitic molecular sieve, *J. Chem. Eng. Data* 55 (2010) 3655–3661.
- [S13] Y. C. Lin, Q. J. Yan, C. L. Kong, L. Chen, Polyethyleneimine incorporated metal-organic frameworks adsorbent for highly selective CO<sub>2</sub> capture, *Sci. Rep.* 3 (2013) 1859–1855.
